# Supplementary material
Source: publisher figshare collection journal article supplement (https://springernature.figshare.com/ndownloader/files/14088650)
Supplement: Supplementary file [file 14088650]

**Appendix 3:** ICD codes\* to identify emergent-cause low back pain.

| <b>Vertebral fracture</b>               | <b>Cancer</b>                      |
|-----------------------------------------|------------------------------------|
| 805.4 Compression fracture lumbar spine | 162 Lung ca                        |
| 805.6 Fracture coccyx/sacrum            | 174.9 Breast ca                    |
| 809.0 Other fracture spine/trunk        | 183.0 Ovary ca                     |
| 959.8 Multiple trauma                   | 185 Prostate ca                    |
| S32.0 Fx lumbar vert, closed            | 189.0 Kidney ca                    |
| S32.1 Fx sacrum closed                  | 191.9 Brain ca                     |
| S32.20 Fx sacrum, closed                | 199.1 Metastatic cancer            |
| S32.80 Fx pelvis, closed                | 202.80 Lymphoma                    |
|                                         | 203.0 Multiple myeloma             |
| <b>Spinal infection</b>                 | 204.1 Chronic lymphocytic leukemia |
| 041.9 Other bacterial                   | 208.0 Acute leukemia               |
| 136.9 Infection not classified          | 214.9 Lipoma                       |
| 324.1 Abscess, spinal                   | 239.6 CNS mass                     |
| 682.2 Abscess back                      | C18.9 Neoplasm of colon            |
| G06.1 Intraspinal abscess and granuloma | C34.9 Neoplasm of lung             |
| M46.4 Discitis                          | C50.9 Neoplasm of breast           |
|                                         | C76.7 Neoplasm, other              |
| <b>Cauda equina syndrome</b>            | C90.0 Multiple myeloma             |
| 334.60/g83.4                            | D36.9 Benign tumour                |

\*Anticipated ICD codes; list to be confirmed through consultation with relevant clinicians and advisory group.
